# Supplementary material for: Opportunities and challenges in interpretable deep learning for drug sensitivity prediction of cancer cells
Source: Frontiers journal article supplement (doi:10.3389/fbinf.2022.1036963), 2022-11-17
Supplement: Data_Sheet_1.PDF [file Data_Sheet_1.PDF]

## Mathematical Frameworks:

### 1. DrugCell<sup>1</sup>

#### Neural Network Configuration:

Each subsystem in the hierarchy of subsystems in DrugCell, is assigned a number  $k$  of neurons to represent its multidimensional state.

$$O^{(s)} = f(W^{(s)} \cdot I^{(s)} + b^{(s)})$$

where:

$O^{(s)}$  is subsystem state represented as a function of the states of its  $c$  child subsystems and  $g$  directly annotated genes.

$W^{(s)}$  is a weight matrix of dimensions  $k \times (k \cdot c + g)$ .

$b^{(s)}$  is a weight vector of dimension  $k$ .

$W^{(s)}$  and  $b^{(s)}$  provide the parameters to be learned for subsystem  $s$ .

$I^{(s)}$  is concatenation of the states of  $c$  child subsystems and  $g$  directly annotated genes.

$f$  is a non-linear transformation based on hyperbolic tangent and batch normalization.

#### Training of parameters is performed using:

Loss function = mean-squared error

Optimizer = SGD

### 2. HiDRA<sup>2</sup>

#### Neural Network Configuration:

The attention module of gene-level network for calculating the importance of each gene:

$$u_{ij} = \tanh(W_i C_i + b_i)_j$$

$$\alpha_{ij} = \frac{\exp(u_{ij}^T)}{\sum_j \exp(u_{ij}^T)}$$
$$p_i = \sum_j \alpha_{ij} g_{ij}$$

where:

$C_i$  is a concatenation vector of  $G_i$  and  $D_i$ ,

$W_i$  is the weight of the attention layer in the gene-level network for pathway  $i$ , and,

$b_i$  is the bias of the attention layer in the gene-level network for the pathway.

The attention module of pathway-level network for calculating the importance of each pathway:

$$u_i = \tanh(W_p Q + b_p)_i$$

$$\alpha_i = \frac{\exp(u_i^T)}{\sum_i \exp(u_i^T)}$$

$$q_i = \alpha_i \odot p_i$$

where:

$Q$  is a concatenation vector of  $P = \{p_1, p_2, \dots, p_{186}\}$  and drug descriptor  $D$ ,  $W_p$  is a weight of the attention layer in the pathway-level network, and  $b_p$  is the bias of the attention layer in the pathway-level network.

**Training of parameters is performed using:**

Loss function = mean-squared error

Optimizer = ADAM

### 3. PathDNN<sup>3</sup>

**Neural Network Configuration:**

Pathway layer = First hidden layer (323 neurons)

Connections between the input layer and the pathway layer = Associations between genes and pathways using 323\*1278 mask matrix ( $M$ )

In the back propagation process, the weights are iteratively updated using the rule as below:

$$W_{\text{mask}} = W_{\text{feedback}} * M$$

where:

$W_{\text{feedback}}$  represents the feedback weights in the last backpropagation iteration, and  $W_{\text{mask}}$  represents the successive forward weight which asserts the sparsity of gene-pathway association.

The feed-forward process is iteratively calculated as below:

$$a_{n+1} = f(W_{n+1}^T a_n + b_{n+1})$$

where:

$W_{n+1}$  is the weights between hidden layers  $H_n$  and  $H_{n+1}$ ,  $b_{n+1}$  is the bias vector, and  $f$  is the activation function that performs nonlinear transformations.

**Training of parameters is performed using:**

Loss function = mean-squared error

Optimizer = ADAM, SGD

#### 4. PaccMann<sup>4</sup>

##### Network Propagation

The propagation function:

$$W_{t+1} = \alpha W_t A' + (1 - \alpha) W_0$$

where:

$D$  is the degree matrix and

$A'$  is the normalized adjacency matrix, obtained from the degree matrix  $D$ :

$$A' = D^{-1/2} A D^{-1/2}$$

**Neural Network Configuration:**

##### Self-Attention (SA)

The SMILES attention weights  $\alpha_i$  were computed as

$$\alpha_i = \frac{\exp(u_i)}{\sum_j \exp(u_j)} \quad \text{where } u_i = V^T \tanh(W_s s_i + b)$$

##### Contextual-Attention (CA)

The contextual attention weights  $\alpha_i$  are computed as :

$$u_i = V^T \tanh(W_s s_i + W_g G) \quad \text{where } W_g \in \mathbb{R}^{A \times |G|}$$

**Training of parameters is performed using:**

Loss function = mean-squared error

Optimizer = ADAM

#### 5. consDeepSignaling<sup>5</sup>

**Neural Network Configuration:**

Input layer node vector :

$X = [x_1, f_1, x_1, f_2, \dots, x_1, f_K, \dots, x_i, f_k, \dots, x_n, f_K] \quad T \in \mathbb{R}^{Kn \times 1}$ ,  
where:

K equals the number of features for each gene,  
n equals the number of genes, and  
 $x_i, f_k$  denotes the kth feature of  $i^{\text{th}}$  gene.

Gene layer node vector:

$G = (g_1, g_2, \dots, g_i, \dots, g_n) \in \mathbb{R}^{n \times 1}$

where:

n equals the number of genes  
 $g_i$  denotes ith gene.

Pathway layer is denoted by  $P = (p_1, p_2, \dots, p_i, \dots, p_s) \in \mathbb{R}^{s \times 1}$ ,  
where s equals the number of signaling pathways.

Feature connection matrix /mask matrix  $C_{XG} \in \mathbb{R}^{Kn \times n}$  :

$$C_{XG} = \begin{bmatrix} c_{1,1} & 0 & & 0 \\ \vdots & \vdots & \cdots & \vdots \\ c_{K,1} & 0 & & 0 \\ \vdots & \vdots & \ddots & \vdots \\ 0 & 0 & & c_{Kn-K+1,n} \\ \vdots & \vdots & \cdots & \vdots \\ 0 & 0 & & c_{Kn,n} \end{bmatrix}$$

Information passing from Input layer to Gene layer:

$$(C_{XG} \cdot W_{XG})TX = G$$

Information passing from Gene layer to Pathway layer:

$$(C_{GP} \cdot W_{GP})TG = P$$

**Training of parameters is performed using:**

Loss function = mean-squared error

Optimizer = ADAM

## 6. DEERS<sup>6</sup>

**Training of parameters is performed using:**

Loss function =  $J(WW)$

$$\begin{aligned} J(WW) = & \text{MSE}(\mathbf{y} - \hat{\mathbf{y}}) + r_D \cdot \text{MSE}(XXD - XX'D) \\ & + r_C \cdot \text{MSE}(XXC - XX'C) \\ & + d \cdot \sum_{m,n, m \neq n} (KKD[m,n])^2 \end{aligned}$$

$$\begin{aligned}
& +d \cdot \sum_{m,n,m \neq n} (KKC[m,n])^2, J(WW) = \text{MSE}(y - y^\wedge) \\
& +rD \cdot \text{MSE}(XXD - XXD') \\
& +rC \cdot \text{MSE}(XXC - XXC') \\
& +d \cdot \sum_{m,n,m \neq n} (KKD[m,n])^2 \\
& +d \cdot \sum_{m,n,m \neq n} (KKC[m,n])^2,
\end{aligned}$$

where :

$J$  is the cost function,

MSE denotes mean squared error,

$WW$  is a set of the model parameters (weights),

$rD$  is the real-valued weight of the drugs reconstruction error,

$XXD$  is the drugs' data matrix in the training batch,

$XX'D$  is the drugs data reconstruction matrix in the batch,  $rC$  is a real-valued weight of the cell lines reconstruction error,

$XXC$  is the cell lines data matrix in the batch,  $XX'C$  is the cell lines data reconstruction matrix in the batch,

$d$  is a weight of the dependence penalty,

$KKD$  is the covariance matrix of drugs hidden representations in the batch, and

$KKC$  is the covariance matrix of cell lines hidden representations in the batch, and

$KK[m,n]$  denotes the  $m, n$ th entry of matrix  $KK$ .

Optimizer = ADAM

## 7. ParsVNN<sup>7</sup>

**Neural Network Configuration:**

Same as DrugCell

**Training of parameters is performed using:**

Loss function =  $L(WI, WS) + \Omega \lambda(WI) + \Gamma \eta(WS)$

where:

$\Omega \lambda(W^I)$  and  $\Gamma \eta(W^S)$  are sparse inducing penalty terms

Optimizer = Proximal Alternative Linearized Minimization (PALM)

## 8. DNN<sup>8</sup>

**Neural Network Configuration:**

$f(\alpha)$  = Output of a neuron

where:

$f$  is a nonlinear activation function

$\alpha = \sum_{i=1}^n w_i x_i + b$

where:

w = Connection weights  
 x = Inputs  
 b = bias

**Training of parameters is performed using:**

Loss function = mean-squared error

Optimizer = NA

## 9. SWnet<sup>9</sup>

**Neural Network Configuration:**

GNN (for molecular graph) edge transition:

$$e_{ij}^{(t+1)} = \sigma(e_{ij}^{(t)} + g_{ij}^{(t)})$$

$$g_{ij}^{(t)} = f(w_e(v_i^{(t)} + v_j^{(t)} + b_e))$$

where :

$\sigma$  is the element-wise sigmoid function and

$f$  is a non-linear activation function like ReLU,  $w_e \in R^{d \times d}$  and  $b_e \in R^d$  are the trainable parameters and bias vector respectively,

$d$  is the dimension of edge embedding vector.

GNN (for molecular graph) node transition:

$$v_i^{(t+1)} = \sigma(v_i^{(t)} + \sum_{j \in N(i)} h_{ij}^{(t)})$$

$$h_{ij}^{(t)} = f(w_n [v_j^{(t)} \quad e_{ij}^{(t)}] + b_n)$$

where:

$w_n \in R^{d \times 2d}$  and  $b_n \in R^d$  are the trainable parameter matrix and bias vector respectively,  $N(i)$  is the set of neighboring indices of  $i$ .

The arithmetic mean of all node embedding from transition function :

$$h_G = 1/N \sum_{i=1}^N v_i^{(t)}$$

where  $N$  is the number of nodes in the graph

Weight matrix to evaluate the significance of genetic mutation:

$$geneCom = geneExp + geneVar * w'$$

where:

$geneCom$  is the combination of expression ( $geneExp$ ) and mutation ( $geneVar$ ).

$w'$  represents the weight for genetic mutation.  $*$  represents the vector dot product.

#### Self-attention:

$$\text{Attention}(Q, K, V) = \text{softmax}(a(Q, K))V$$

$Q, K$  represent SMILES of compounds.

$V$  represents weight parameters of gene weight layer.

$a(Q, K)$  is an alignment function which gives scores how well the inputs and the outputs match, and they normalized the scores by softmax function.

#### **Training of parameters is performed using:**

Loss function = mean-squared error

Optimizer = ADAM

## References:

1. Kuenzi, B. M. *et al.* Predicting Drug Response and Synergy Using a Deep Learning Model of Human Cancer Cells. *Cancer Cell* **38**, 672-684.e6 (2020).
2. Jin, I. & Nam, H. HiDRA: Hierarchical Network for Drug Response Prediction with Attention. *J Chem Inf Model* **61**, 3858–3867 (2021).
3. Deng, L. *et al.* Pathway-Guided Deep Neural Network toward Interpretable and Predictive Modeling of Drug Sensitivity. *J Chem Inf Model* **60**, 4497–4505 (2020).
4. Manica, M. *et al.* Toward Explainable Anticancer Compound Sensitivity Prediction via Multimodal Attention-Based Convolutional Encoders. *Mol Pharm* **16**, 4797–4806 (2019).
5. Zhang, H., Chen, Y. & Li, F. Predicting Anticancer Drug Response With Deep Learning Constrained by Signaling Pathways. *Frontiers in Bioinformatics* **1**, (2021).
6. Koras, K., Kizling, E., Juraeva, D., Staub, E. & Szczurek, E. Interpretable deep recommender system model for prediction of kinase inhibitor efficacy across cancer cell lines. *Sci Rep* **11**, 15993 (2021).
7. Huang, X. *et al.* ParsVNN: parsimony visible neural networks for uncovering cancer-specific and drug-sensitive genes and pathways. *NAR Genom Bioinform* **3**, (2021).
8. Sakellaropoulos, T. *et al.* A Deep Learning Framework for Predicting Response to Therapy in Cancer. *Cell Rep* **29**, 3367-3373.e4 (2019).
9. Zuo, Z. *et al.* SWnet: a deep learning model for drug response prediction from cancer genomic signatures and compound chemical structures. *BMC Bioinformatics* **22**, 434 (2021).
